# Supplementary material
Source: Springer Nature journal article supplement (https://www.springermedizin.de/resource/supplementary/12891_2011_1248_MOESM7_ESM.pdf/9507420)

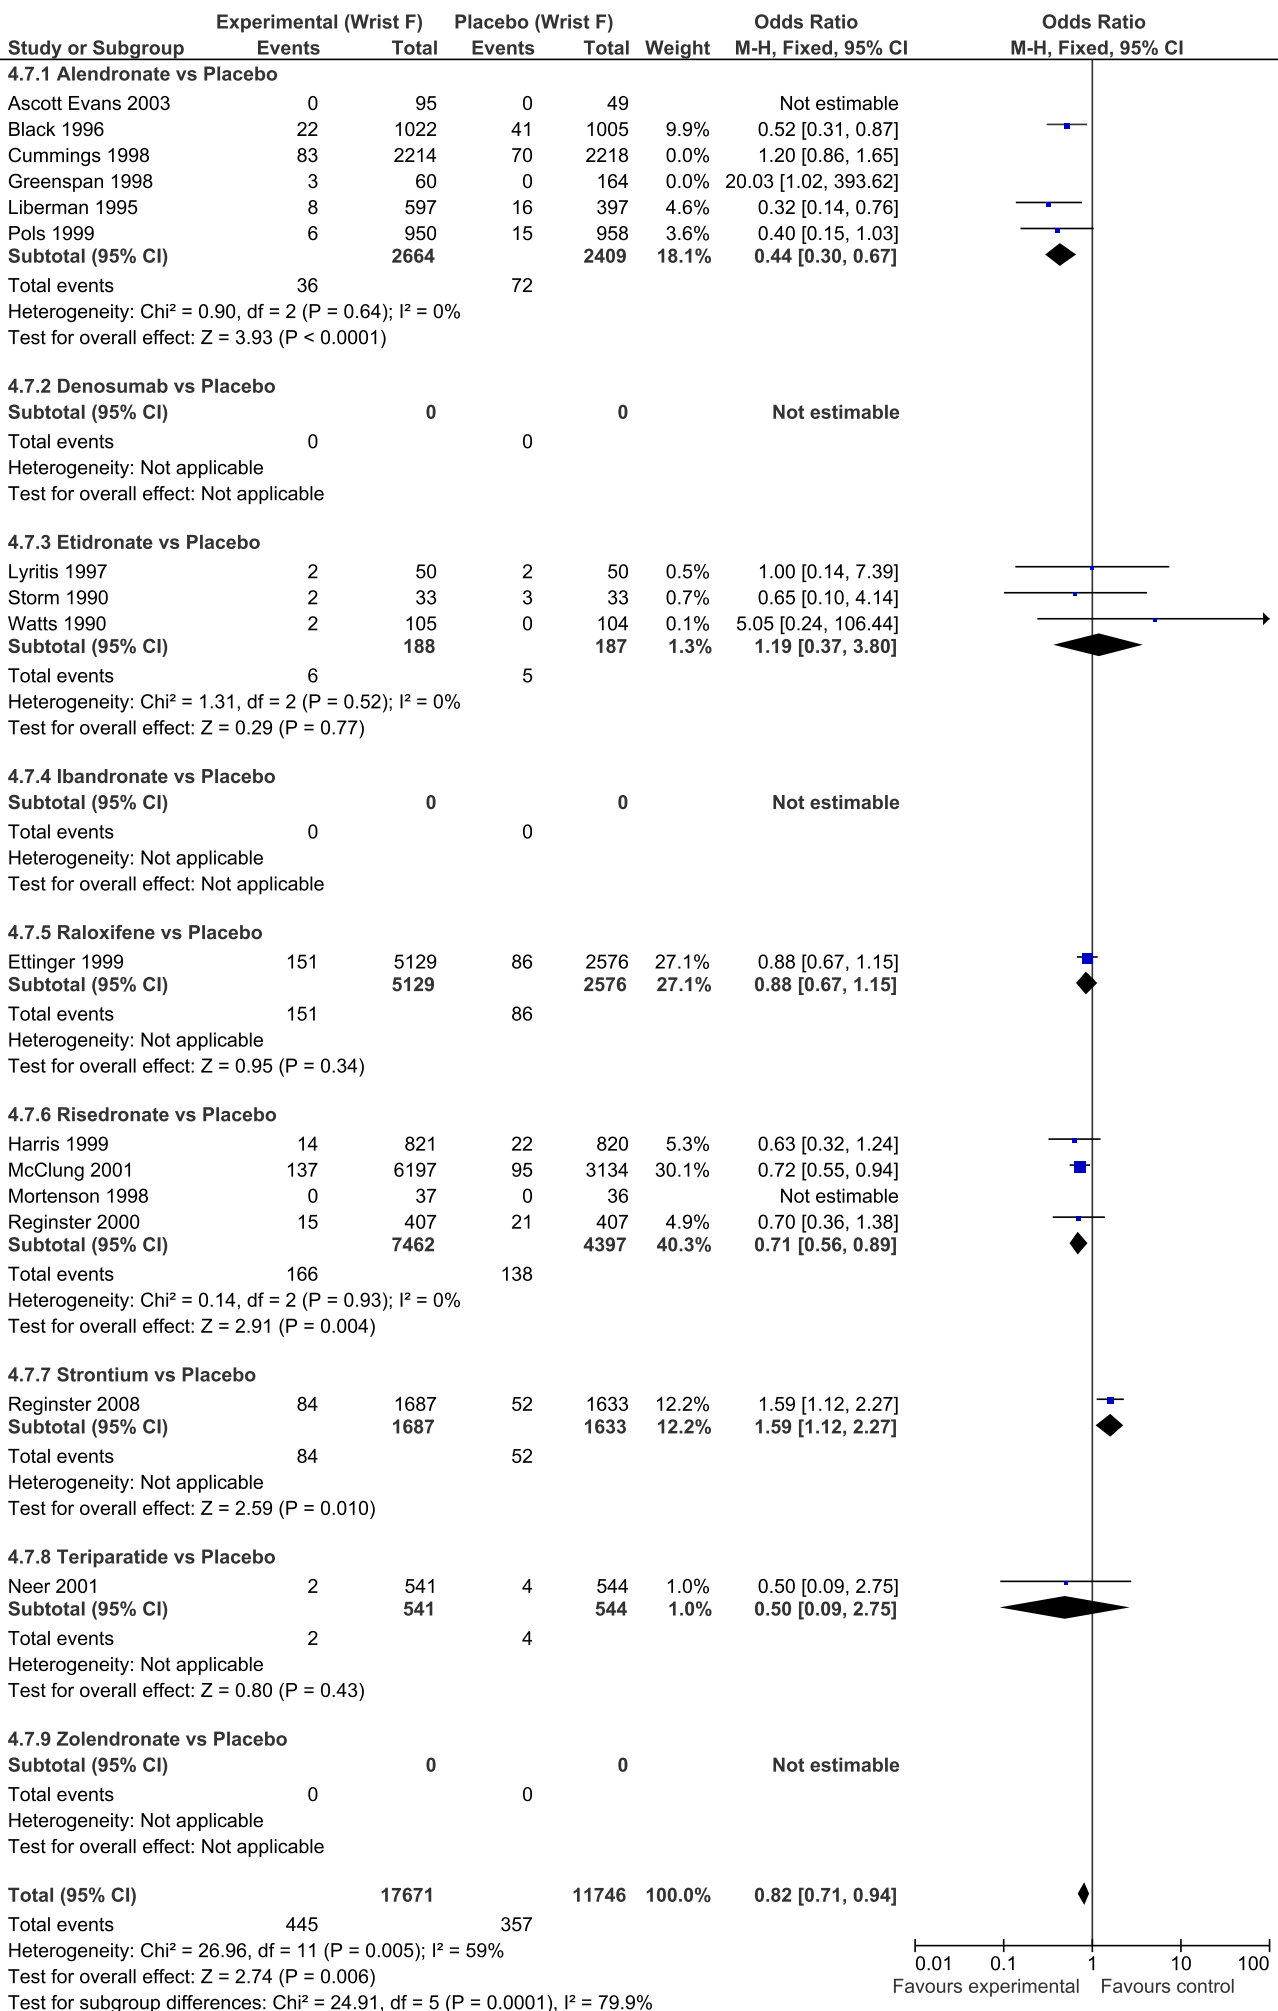

Supplement: MOESM7 [file 9507420]
